# Supplementary material for: Naphthalimide-based organic nanoparticles for aluminium recognition in acidic soil and aqueous media
Source: Royal Society of Chemistry journal article supplement (doi:10.1039/c4nj00473f), 2014-07-16
Supplement: c4nj00473f1.pdf [file c4nj00473f1.pdf]

## Supporting Information

# Naphthalimide Based Organic Nanoparticles for Aluminium Recognition in Acidic Soil and Aqueous Medium

Anu Saini<sup>a</sup>, Jasinder Singh<sup>b</sup>, Rajinder Kaur<sup>a</sup>, Narinder Singh<sup>b,\*</sup>, Navneet Kaur<sup>b,\*</sup>

<sup>a</sup>*Centre for Nanoscience and Nanotechnology (UIEAST), Panjab University, Chandigarh, 160014, India.*

<sup>b</sup>*Department of Chemistry, Indian Institute of Technology Ropar (IIT Ropar), Rupnagar, Panjab, 140001, India*

\*Corresponding Authors:

*[nsingh@iitrpr.ac.in](mailto:nsingh@iitrpr.ac.in); Tel: 91- 1881242176*

*[navneetkaur@pu.ac.in](mailto:navneetkaur@pu.ac.in); Tel: +91-1722534464*

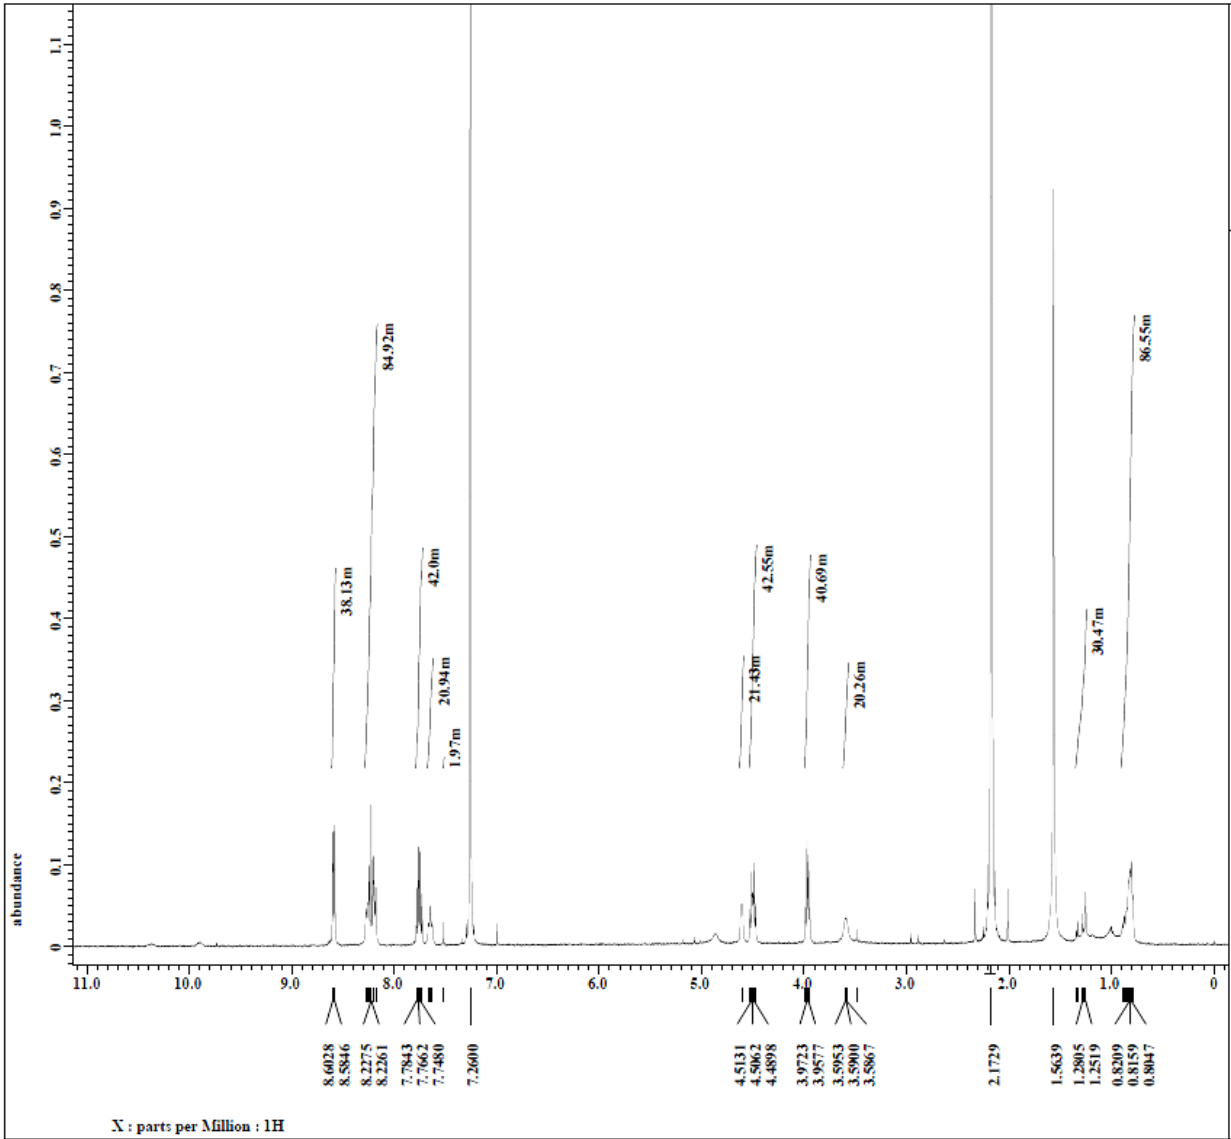

Figure S1. <sup>1</sup>H NMR spectrum of compound 1

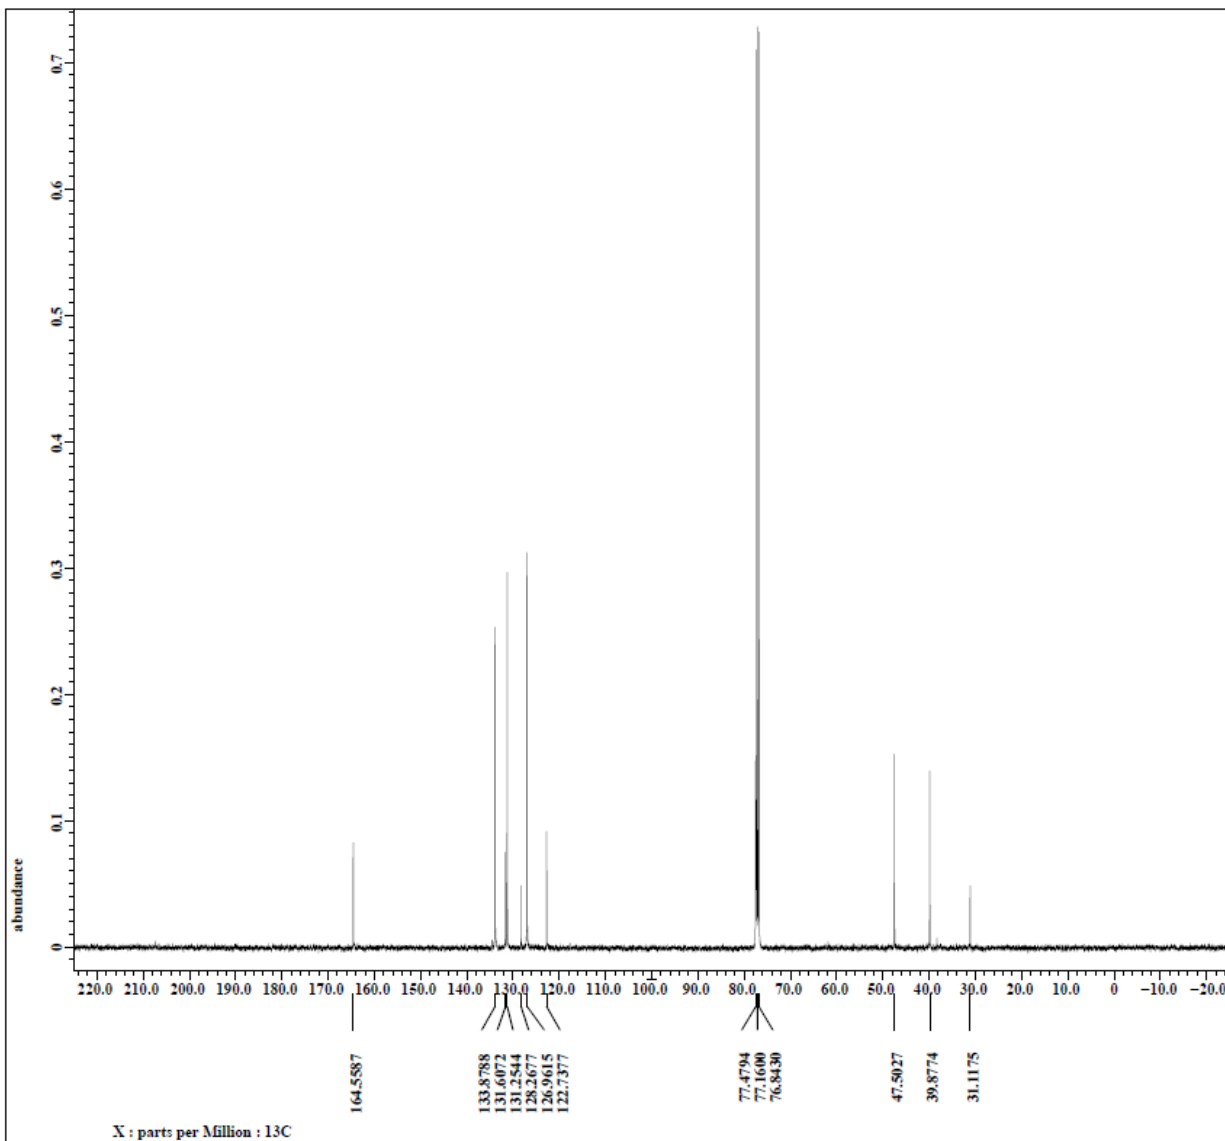

Figure S2. <sup>13</sup>C NMR spectrum of compound 1

WATERS, Q-TOF MICROMASS (LC-MS)  
VIMAL TS-4 24 (0.252) Cm (23:35)

SAIF/CIL, PANJAB UNIVERSITY, CHANDIGARH  
TOF MS ES+  
2.80e4

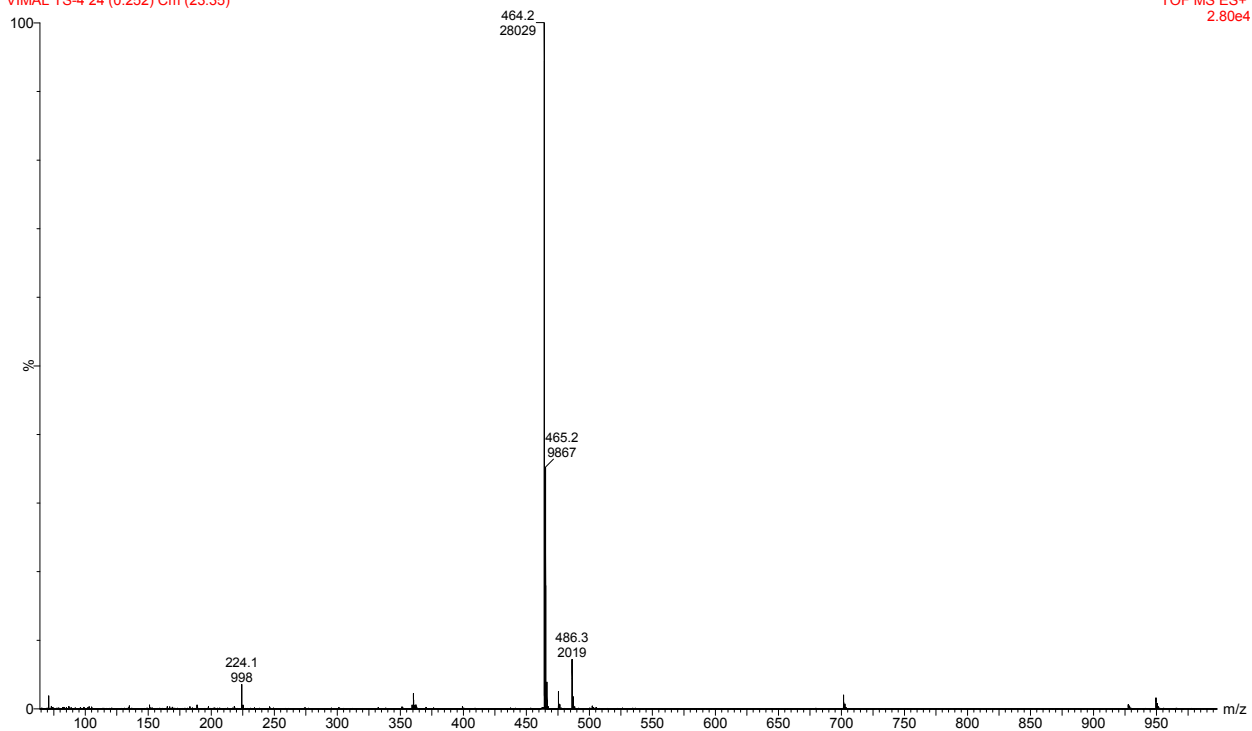

Figure S3. Mass spectrum of compound 1

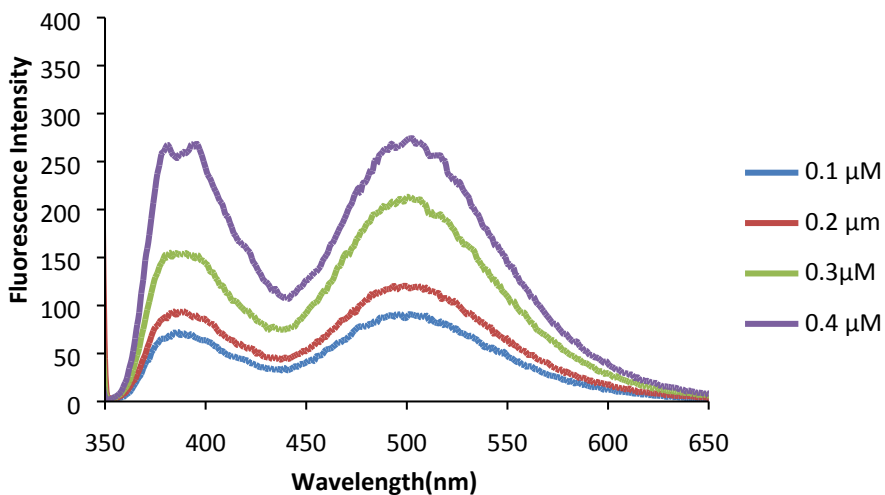

**Figure S4. Effect on fluorescence spectrum of compound 1, upon increasing the concentration of compound used for preparing the nanoaggregates.**

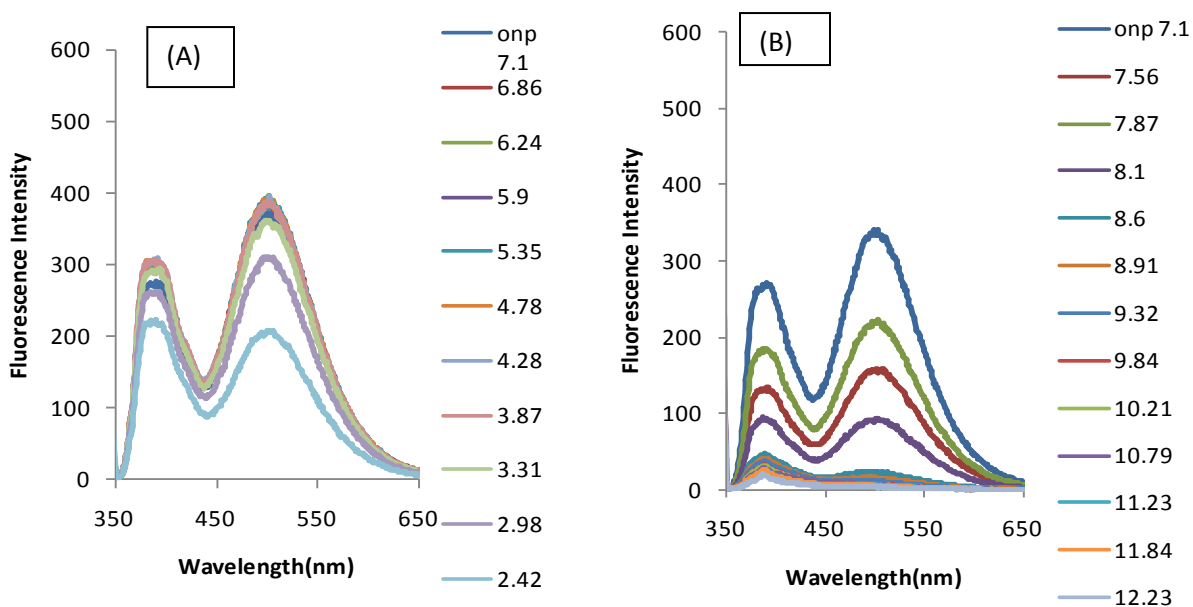

**Figure S5. (A) Effect of addition of acid on organic nanoparticles of compound 1(0.15mM); (B) Effect of addition of base on organic nanoparticles of compound 1 (0.15mM)**

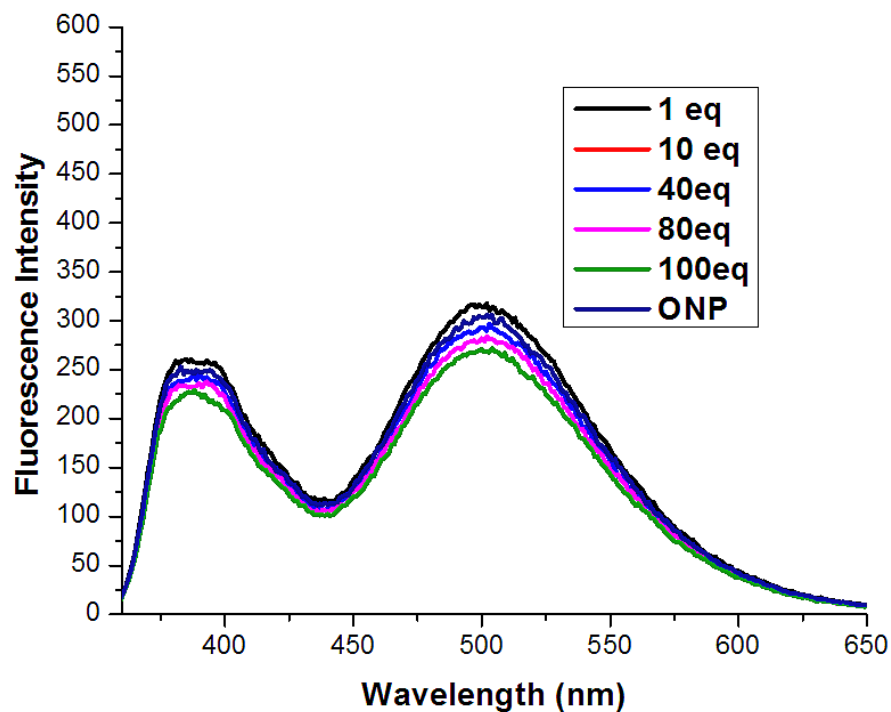

Figure S6. Effect of ionic strength on ONP 1 upon addition of 0- 100 equiv. of TBA salt of perchlorate.

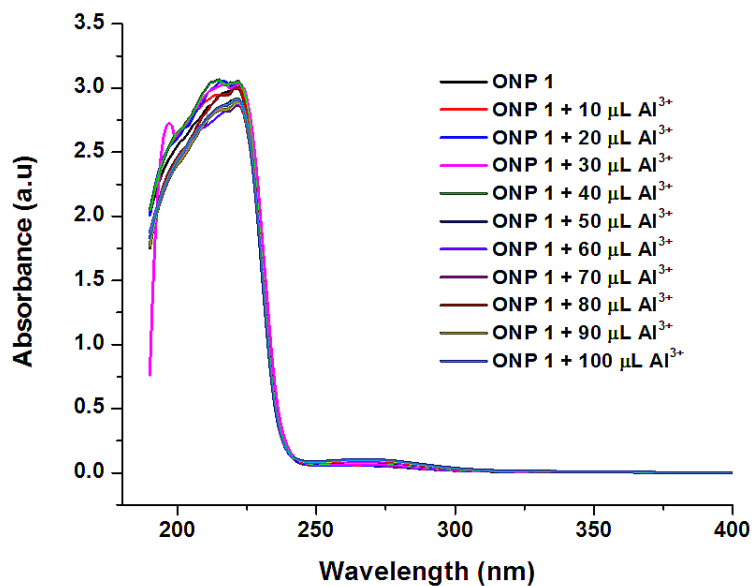

Figure S7: Titration of ONP1 with Al<sup>3+</sup> ions

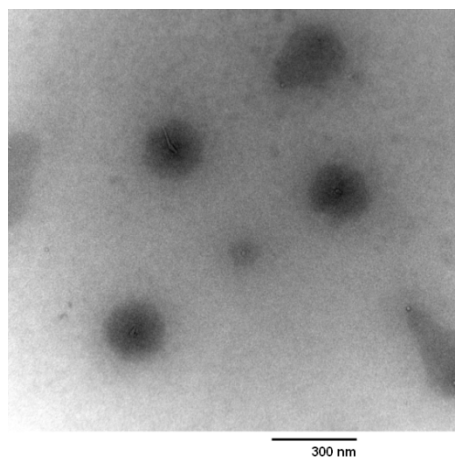

**Figure S8:** TEM image of **ONP 1** upon addition of 5.0 equiv. of  $\text{Al}^{3+}$ .
